# Supplementary material
Source: publisher figshare collection journal article supplement (https://gsajournals.figshare.com/ndownloader/files/17799332)
Supplement: Supplementary file 1 [file 17799332]

## Sheet: CHRR_linkage_map
LG	# Group	Marker	RACA assembly	Map position (cM)	Scaffolds after anchoing	Scaffold Orientation	Scaffold start point	LG-based scaffold start point	NodeIndex
Om01	Group7	48607	RACA_39	0	CHRR00184.0	-	1667670	2721689	0
Om01	Group7	48582	RACA_39	1.09	CHRR00184.0	-	1412448	2976911	0
Om01	Group7	48548	RACA_39	5.143	CHRR00184.0	-	1036540	3352819	0
Om01	Group7	48452	RACA_39	6.639	CHRR00184.0	-	206089	4183270	0
Om01	Group7	66112	sc00218	7.084	SC00218	+	10416	4399874	1
Om01	Group7	31801	RACA_1	9.448	CHRR00004.0	+	302929	5361699	2
Om01	Group7	71257	sc01635	10.56	SC01635	-	22000	5545073	3
Om01	Group7	61771	RACA_33	14.052	CHRR00061.0	-	138073	6095526	4
Om01	Group7	49862	RACA_39	16.767	CHRR00183.0	-	1900388	7118096	5
Om01	Group7	49781	RACA_39	16.784	CHRR00183.0	-	1182266	7836218	5
Om01	Group7	49424	RACA_39	17.65	CHRR00086.0	-	5707438	10459888	6
Om01	Group7	49416	RACA_39	18.191	CHRR00086.0	-	5604269	10563057	6
Om01	Group7	49402	RACA_39	19.257	CHRR00086.0	-	5551426	10615900	6
Om01	Group7	49372	RACA_39	19.882	CHRR00086.0	-	5301807	10865519	6
Om01	Group7	49239	RACA_39	21.322	CHRR00086.0	-	4085226	12082100	6
Om01	Group7	49222	RACA_39	22.504	CHRR00086.0	-	3910335	12256991	6
Om01	Group7	28972	RACA_40	28.787	RACA_40	-	14053950	18596426	7
Om01	Group7	28953	RACA_40	29.993	RACA_40	-	13862517	18787859	7
Om01	Group7	28721	RACA_40	32.388	RACA_40	-	11887424	20762952	7
Om01	Group7	28714	RACA_40	32.608	RACA_40	-	11858358	20792018	7
Om01	Group7	30216	RACA_40	36.386	RACA_40	-	9802984	22847392	7
Om01	Group7	30038	RACA_40	36.386	RACA_40	-	8501728	24148648	7
Om01	Group7	29967	RACA_40	41.533	RACA_40	-	8056955	24593421	7
Om01	Group7	29934	RACA_40	41.886	RACA_40	-	7867019	24783357	7
Om01	Group7	29853	RACA_40	42.949	RACA_40	-	7242361	25408015	7
Om01	Group7	29768	RACA_40	43.471	RACA_40	-	6636736	26013640	7
Om01	Group7	29746	RACA_40	43.471	RACA_40	-	6382520	26267856	7
Om01	Group7	29714	RACA_40	48.464	RACA_40	-	6107917	26542459	7
Om01	Group7	29647	RACA_40	53.881	RACA_40	-	5501661	27148715	7
Om01	Group7	29610	RACA_40	58.615	RACA_40	-	5059761	27590615	7
Om01	Group7	29546	RACA_40	60.331	RACA_40	-	4375918	28274458	7
Om01	Group7	29449	RACA_40	61.703	RACA_40	-	3696092	28954284	7
Om01	Group7	29390	RACA_40	63.503	RACA_40	-	3158734	29491642	7
Om01	Group7	29667	RACA_40	76.263	RACA_40	-	575248	32075128	7
Om01	Group7	29545	RACA_40	77.92	RACA_40	-	435683	32214693	7
Om01	Group7	29500	RACA_40	77.92	RACA_40	-	407480	32242896	7
Om01	Group7	29311	RACA_40	77.92	RACA_40	-	253010	32397366	7
Om02	Group21	36241	RACA_37	2.538	CHRR00077.0	+	92683	92683	0
Om02	Group21	36086	RACA_37	2.684	CHRR00077.0	+	754680	754680	0
Om02	Group21	48076	RACA_35	3.653	CHRR00069.0	-	210906	1396126	1
Om02	Group21	54974	RACA_17	10.221	CHRR00023.0	-	14702	1858040	2
Om02	Group21	68737	sc00297	11.881	SC00297	-	146998	1985477	3
Om02	Group21	68732	sc00297	11.886	SC00297	-	106159	2026316	3
Om02	Group21	64317	sc00159	19.011	CHRR00098.0	-	9515	2421841	4
Om02	Group21	35979	RACA_37	21.12	CHRR00154.0	+	3618874	6050329	5
Om02	Group21	36169	RACA_37	24.102	CHRR00154.0	+	5955624	8387079	5
Om02	Group21	36195	RACA_37	25.149	CHRR00154.0	+	6289000	8720455	5
Om02	Group21	69039	sc00309	25.486	SC00309	-	64872	8897934	6
Om02	Group21	34809	RACA_31	26.947	CHRR00044.0	-	43121	8996846	7
Om02	Group21	36205	RACA_37	28.898	CHRR00155.0	+	117775	9157841	8
Om02	Group21	35483	RACA_37	29.81	CHRR00155.0	+	1642961	10683027	8
Om02	Group21	35490	RACA_37	30.001	CHRR00155.0	+	1679824	10719890	8
Om02	Group21	35495	RACA_37	30.001	CHRR00155.0	+	1910707	10950773	8
Om02	Group21	28330	RACA_38	33.962	CHRR00083.0	+	468889	11526851	9
Om02	Group21	28446	RACA_38	37.386	CHRR00085.0	+	437399	12621622	10
Om02	Group21	68272	sc00282	46.993	CHRR00106.0	-	158514	13466690	11
Om02	Group21	60225	RACA_33	47.578	CHRR00059.0	-	444282	13778217	12
Om02	Group21	28192	RACA_38	48.441	CHRR00157.0	-	637111	15266851	13
Om02	Group21	28111	RACA_38	49.854	CHRR00157.0	-	71629	15832333	13
Om02	Group21	71467	sc02149	51.229	SC02149	-	1014	15908025	14
Om02	Group21	28105	RACA_38	51.781	CHRR00156.0	-	3631798	15954127	15
Om02	Group21	27992	RACA_38	52.19	CHRR00156.0	-	2549157	17036768	15
Om02	Group21	27979	RACA_38	52.766	CHRR00156.0	-	2447090	17138835	15
Om02	Group21	27974	RACA_38	52.883	CHRR00156.0	-	2381658	17204267	15
Om02	Group21	27958	RACA_38	52.893	CHRR00156.0	-	2280027	17305898	15
Om02	Group21	27852	RACA_38	55.866	CHRR00156.0	-	1078131	18507794	15
Om02	Group21	28092	RACA_38	55.945	CHRR00156.0	-	332809	19253116	15
Om02	Group21	66650	sc00233	58.372	SC00233	+	502718	20088742	16
Om02	Group21	66936	sc00244	58.41	SC00244	-	287890	20505634	17
Om02	Group21	66935	sc00244	58.41	SC00244	-	287712	20505812	17
Om02	Group21	71586	sc02730	58.53	SC02730	-	2809	20793894	18
Om02	Group21	62998	RACA_33	58.553	CHRR00056.0	-	683502	21302106	19
Om02	Group21	63799	sc00127	58.662	CHRR00094.0	-	17118	22066570	20
Om02	Group21	59186	RACA_21	58.678	CHRR00035.0	-	45225	22188280	21
Om03	Group5	38537	RACA_36	0	CHRR00177.0	+	653740	653740	0
Om03	Group5	38566	RACA_36	0.133	CHRR00177.0	+	863902	863902	0
Om03	Group5	38627	RACA_36	0.133	CHRR00177.0	+	1567487	1567487	0
Om03	Group5	38665	RACA_36	0.272	CHRR00177.0	+	1924091	1924091	0
Om03	Group5	38678	RACA_36	2.034	CHRR00177.0	+	2060934	2060934	0
Om03	Group5	38445	RACA_36	5.592	CHRR00074.0	-	721519	2578587	1
Om03	Group5	67222	sc00249	10.434	SC00249	+	86530	3386735	2
Om03	Group5	67194	sc00249	11.902	SC00249	+	188589	3488794	2
Om03	Group5	38163	RACA_36	13.31	CHRR00176.0	-	392240	5926868	3
Om03	Group5	38153	RACA_36	13.379	CHRR00176.0	-	273948	6045160	3
Om03	Group5	38775	RACA_36	16.717	CHRR00178.0	+	513738	6832945	4
Om03	Group5	38780	RACA_36	17.242	CHRR00178.0	+	536091	6855298	4
Om03	Group5	69108	sc00312	20.149	SC00312	-	174423	6986620	5
Om03	Group5	38815	RACA_36	20.252	CHRR00179.0	+	63918	7225060	6
Om03	Group5	38835	RACA_36	20.394	CHRR00179.0	+	228739	7389881	6
Om03	Group5	66241	sc00219	20.42	CHRR00104.0	-	80791	8904927	7
Om03	Group5	69907	sc00369	20.457	SC00369	-	32103	9031608	8
Om03	Group5	67436	sc00255	22.103	SC00255	+	29281	9093091	9
Om03	Group5	67444	sc00255	23.643	SC00255	+	35613	9099423	9
Om03	Group5	38060	RACA_36	25.621	CHRR00175.0	-	24987062	10286590	10
Om03	Group5	37727	RACA_36	30.562	CHRR00175.0	-	21605875	13667777	10
Om03	Group5	37647	RACA_36	33.214	CHRR00175.0	-	20852256	14421396	10
Om03	Group5	37639	RACA_36	33.812	CHRR00175.0	-	20819030	14454622	10
Om03	Group5	37212	RACA_36	43.842	CHRR00175.0	-	16314466	18959186	10
Om03	Group5	37143	RACA_36	49.219	CHRR00175.0	-	15835244	19438408	10
Om03	Group5	37035	RACA_36	54.385	CHRR00175.0	-	14738567	20535085	10
Om03	Group5	37006	RACA_36	54.675	CHRR00175.0	-	14255048	21018604	10
Om03	Group5	39402	RACA_36	56.339	CHRR00175.0	-	7148966	28124686	10
Om03	Group5	39359	RACA_36	57.67	CHRR00175.0	-	6810267	28463385	10
Om03	Group5	39337	RACA_36	57.692	CHRR00175.0	-	6650610	28623042	10
Om03	Group5	39292	RACA_36	57.692	CHRR00175.0	-	6205799	29067853	10
Om03	Group5	39210	RACA_36	75.358	CHRR00175.0	-	5484143	29789509	10
Om03	Group5	39106	RACA_36	84.061	CHRR00175.0	-	4469753	30803899	10
Om03	Group5	37470	RACA_36	89.184	CHRR00175.0	-	1636415	33637237	10
Om04	Group6	68986	sc00307	0.827	SC00307	-	236592	17316	0
Om04	Group6	10070	RACA_34	2.129	CHRR00182.0	-	1233429	1514173	1
Om04	Group6	10027	RACA_34	2.484	CHRR00182.0	-	853586	1894016	1
Om04	Group6	9939	RACA_34	3.175	CHRR00182.0	-	22606	2724996	1
Om04	Group6	24513	RACA_4	3.795	CHRR00091.0	-	328632	2809679	2
Om04	Group6	9912	RACA_34	4.119	CHRR00181.0	-	239853	3249192	3
Om04	Group6	9899	RACA_34	5.132	CHRR00181.0	-	42791	3446254	3
Om04	Group6	48234	RACA_35	7.218	CHRR00070.0	-	1037427	4213426	4
Om04	Group6	48221	RACA_35	7.218	CHRR00070.0	-	978020	4272833	4
Om04	Group6	28419	RACA_38	7.256	CHRR00084.0	-	17037	5256445	5
Om04	Group6	9876	RACA_34	8.042	CHRR00180.0	-	17785918	5343658	6
Om04	Group6	9875	RACA_34	8.517	CHRR00180.0	-	17761787	5367789	6
Om04	Group6	11167	RACA_34	8.932	CHRR00180.0	-	7905182	15224394	6
Om04	Group6	10991	RACA_34	28.16	CHRR00180.0	-	5878187	17251389	6
Om04	Group6	10902	RACA_34	31.898	CHRR00180.0	-	4684791	18444785	6
Om04	Group6	10868	RACA_34	33.617	CHRR00180.0	-	4152734	18976842	6
Om04	Group6	10828	RACA_34	36.921	CHRR00180.0	-	3625994	19503582	6
Om04	Group6	10763	RACA_34	40.718	CHRR00180.0	-	2840028	20289548	6
Om04	Group6	10649	RACA_34	40.718	CHRR00180.0	-	2417272	20712304	6
Om04	Group6	10197	RACA_34	42.533	CHRR00180.0	-	2025973	21103603	6
Om04	Group6	9396	RACA_34	45.737	CHRR00180.0	-	1253919	21875657	6
Om04	Group6	10587	RACA_34	47.727	CHRR00065.0	-	2148372	24364985	7
Om04	Group6	10476	RACA_34	49.748	CHRR00065.0	-	1069657	25443700	7
Om04	Group6	47813	RACA_35	55.226	CHRR00068.0	+	121770	26635226	8
Om04	Group6	47505	RACA_35	57.414	CHRR00066.0	-	1254018	30436505	9
Om04	Group6	47945	RACA_35	59.076	CHRR00066.0	-	510137	31180386	9
Om05	Group13	61644	RACA_33	0	CHRR00121.0	-	3832876	1220838	0
Om05	Group13	61403	RACA_33	4.288	CHRR00121.0	-	1929723	3123991	0
Om05	Group13	61397	RACA_33	5.324	CHRR00121.0	-	1834743	3218971	0
Om05	Group13	61262	RACA_33	8.569	CHRR00121.0	-	615993	4437721	0
Om05	Group13	61236	RACA_33	8.579	CHRR00121.0	-	418643	4635071	0
Om05	Group13	62568	RACA_33	10.481	CHRR00062.0	-	7066832	5464185	1
Om05	Group13	61205	RACA_33	13.771	CHRR00120.0	-	9547321	12587536	2
Om05	Group13	61151	RACA_33	14.061	CHRR00120.0	-	9063924	13070933	2
Om05	Group13	60971	RACA_33	17.326	CHRR00120.0	-	7785718	14349139	2
Om05	Group13	60801	RACA_33	17.757	CHRR00120.0	-	6592129	15542728	2
Om05	Group13	60558	RACA_33	20.261	CHRR00120.0	-	3989495	18145362	2
Om05	Group13	60515	RACA_33	20.648	CHRR00120.0	-	3662475	18472382	2
Om05	Group13	64279	sc00159	29.848	CHRR00099.0	+	309560	22444516	3
Om05	Group13	67818	sc00268	37.282	SC00268	-	244921	23004263	4
Om05	Group13	67831	sc00268	37.705	SC00268	-	47665	23201519	4
Om05	Group13	68895	sc00303	38.266	CHRR00109.0	-	10123	23440416	5
Om05	Group13	66828	sc00241	38.676	SC00241	-	15328	23951780	6
Om05	Group13	59967	RACA_33	39.299	CHRR00119.0	-	2419193	26064537	7
Om05	Group13	59780	RACA_33	40.616	CHRR00119.0	-	666784	27816946	7
Om05	Group13	70426	sc00472	41.754	SC00472	-	34345	28500187	8
Om05	Group13	63210	RACA_33	46.208	CHRR00118.0	-	1735691	28857254	9
Om05	Group13	63194	RACA_33	46.965	CHRR00118.0	-	1365015	29227930	9
Om05	Group13	60496	RACA_33	64.106	CHRR00055.0	+	185439	30778483	10
Om05	Group13	62985	RACA_33	67.248	CHRR00055.0	+	715504	31308548	10
Om05	Group13	60604	RACA_33	68.924	CHRR00055.0	+	1950949	32543993	10
Om05	Group13	60869	RACA_33	68.926	CHRR00055.0	+	2235425	32828469	10
Om05	Group13	62833	RACA_33	71.935	CHRR00055.0	+	5971679	36564723	10
Om06	Group4	15564	RACA_32	3.229	CHRR00174.0	-	3459510	720703	0
Om06	Group4	15516	RACA_32	4.138	CHRR00174.0	-	2973954	1206259	0
Om06	Group4	15501	RACA_32	4.274	CHRR00174.0	-	2890620	1289593	0
Om06	Group4	15394	RACA_32	5.402	CHRR00174.0	-	2118251	2061962	0
Om06	Group4	15266	RACA_32	5.402	CHRR00174.0	-	744163	3436050	0
Om06	Group4	37821	RACA_36	5.402	CHRR00071.0	-	229348	4248788	1
Om06	Group4	15137	RACA_32	5.922	CHRR00173.0	-	104916	4887847	2
Om06	Group4	15132	RACA_32	6.243	CHRR00173.0	-	53796	4938967	2
Om06	Group4	64851	sc00177	6.279	SC00177	+	493115	5485977	3
Om06	Group4	47766	RACA_35	7.267	CHRR00067.0	+	124799	6084570	4
Om06	Group4	65134	sc00191	8.03	CHRR00101.0	+	116678	6381878	5
Om06	Group4	65145	sc00191	8.599	CHRR00101.0	+	202520	6467720	5
Om06	Group4	65159	sc00191	8.61	CHRR00101.0	+	380084	6645284	5
Om06	Group4	63794	sc00127	8.698	CHRR00093.0	-	873613	6827777	6
Om06	Group4	63760	sc00127	8.787	CHRR00093.0	-	578474	7122916	6
Om06	Group4	63679	sc00127	8.787	CHRR00095.0	+	277106	7978595	7
Om06	Group4	63681	sc00127	8.787	CHRR00095.0	+	283162	7984651	7
Om06	Group4	65882	sc00209	13.451	SC00209	-	551148	8318294	8
Om06	Group4	71878	sc06042	15.308	SC06042	-	646	8870287	9
Om06	Group4	14986	RACA_32	18.721	CHRR00172.0	-	7372476	10248721	10
Om06	Group4	14978	RACA_32	19.054	CHRR00172.0	-	7257022	10364175	10
Om06	Group4	14949	RACA_32	19.33	CHRR00172.0	-	7024123	10597074	10
Om06	Group4	14914	RACA_32	21.141	CHRR00172.0	-	6652217	10968980	10
Om06	Group4	14908	RACA_32	21.26	CHRR00172.0	-	6610829	11010368	10
Om06	Group4	14880	RACA_32	22.435	CHRR00172.0	-	6363249	11257948	10
Om06	Group4	14796	RACA_32	24.719	CHRR00172.0	-	5295970	12325227	10
Om06	Group4	14686	RACA_32	26.816	CHRR00172.0	-	4319864	13301333	10
Om06	Group4	14575	RACA_32	29.86	CHRR00172.0	-	3229319	14391878	10
Om06	Group4	14565	RACA_32	30.082	CHRR00172.0	-	3132233	14488964	10
Om06	Group4	14472	RACA_32	32.934	CHRR00172.0	-	2297899	15323298	10
Om06	Group4	14451	RACA_32	34.328	CHRR00172.0	-	2051913	15569284	10
Om06	Group4	14431	RACA_32	35.181	CHRR00172.0	-	1842725	15778472	10
Om06	Group4	14429	RACA_32	35.712	CHRR00172.0	-	1815023	15806174	10
Om06	Group4	14379	RACA_32	36.733	CHRR00172.0	-	1336938	16284259	10
Om06	Group4	13746	RACA_32	40.776	CHRR00171.0	-	7435258	21574129	11
Om06	Group4	13684	RACA_32	45.766	CHRR00171.0	-	6682307	22327080	11
Om06	Group4	13538	RACA_32	45.881	CHRR00171.0	-	5156579	23852808	11
Om06	Group4	13472	RACA_32	46.835	CHRR00171.0	-	4564117	24445270	11
Om06	Group4	16461	RACA_32	47.907	CHRR00171.0	-	3635068	25374319	11
Om06	Group4	16459	RACA_32	48.029	CHRR00171.0	-	3623052	25386335	11
Om06	Group4	16170	RACA_32	53.275	CHRR00171.0	-	900595	28108792	11
Om06	Group4	16161	RACA_32	53.275	CHRR00171.0	-	861106	28148281	11
Om06	Group4	16104	RACA_32	53.275	CHRR00171.0	-	468350	28541037	11
Om06	Group4	16100	RACA_32	56.822	CHRR00171.0	-	460095	28549292	11
Om06	Group4	16037	RACA_32	58.675	CHRR00171.0	-	58255	28951132	11
Om06	Group4	71850	sc05627	64.876	SC05627	-	865	29010083	12
Om06	Group4	16001	RACA_32	65.118	CHRR00170.0	-	5967388	29189170	13
Om06	Group4	15983	RACA_32	65.178	CHRR00170.0	-	5816371	29340187	13
Om06	Group4	15979	RACA_32	65.862	CHRR00170.0	-	5789087	29367471	13
Om06	Group4	14047	RACA_32	68.551	CHRR00170.0	-	1635829	33520729	13
Om07	Group12	35193	RACA_31	0	CHRR00047.0	+	1838928	1838928	0
Om07	Group12	35355	RACA_31	3.336	CHRR00047.0	+	3410979	3410979	0
Om07	Group12	35385	RACA_31	4.979	CHRR00047.0	+	3669989	3669989	0
Om07	Group12	35401	RACA_31	11.313	CHRR00047.0	+	3875561	3875561	0
Om07	Group12	35403	RACA_31	15.291	CHRR00047.0	+	3875761	3875761	0
Om07	Group12	32909	RACA_31	16.964	CHRR00047.0	+	7612479	7612479	0
Om07	Group12	32915	RACA_31	17.992	CHRR00047.0	+	7687608	7687608	0
Om07	Group12	33170	RACA_31	23.813	CHRR00047.0	+	10044397	10044397	0
Om07	Group12	33376	RACA_31	31.064	CHRR00047.0	+	12432323	12432323	0
Om07	Group12	33409	RACA_31	31.771	CHRR00047.0	+	12724702	12724702	0
Om07	Group12	33585	RACA_31	32.5	CHRR00047.0	+	14463384	14463384	0
Om07	Group12	33598	RACA_31	32.5	CHRR00047.0	+	14615344	14615344	0
Om07	Group12	33628	RACA_31	43.764	CHRR00047.0	+	14932226	14932226	0
Om07	Group12	33876	RACA_31	49.624	CHRR00047.0	+	17604982	17604982	0
Om07	Group12	33916	RACA_31	49.667	CHRR00047.0	+	17826293	17826293	0
Om07	Group12	33967	RACA_31	54.797	CHRR00047.0	+	18343856	18343856	0
Om07	Group12	33981	RACA_31	54.801	CHRR00047.0	+	18464344	18464344	0
Om07	Group12	34171	RACA_31	54.874	CHRR00050.0	+	667020	19828094	1
Om07	Group12	34185	RACA_31	54.971	CHRR00050.0	+	757093	19918167	1
Om07	Group12	34235	RACA_31	59.7	CHRR00050.0	+	1318729	20479803	1
Om07	Group12	32953	RACA_31	62.832	CHRR00043.0	+	1343657	26662577	2
Om07	Group12	34849	RACA_31	66.13	CHRR00045.0	+	385160	29216832	3
Om07	Group12	34886	RACA_31	66.44	CHRR00045.0	+	746430	29578102	3
Om07	Group12	70673	sc00639	66.62	SC00639	-	15558	30625887	4
Om07	Group12	42634	RACA_13	67.809	CHRR00012.0	-	28431	30919193	5
Om07	Group12	67705	sc00265	68.562	SC00265	+	285569	31233292	6
Om07	Group12	67992	sc00275	68.566	SC00275	-	256665	31523141	7
Om07	Group12	71649	sc03120	69.228	SC03120	-	231	31782242	8
Om07	Group12	71386	sc01926	69.246	SC01926	-	5244	31783347	9
Om07	Group12	35565	RACA_37	69.713	CHRR00078.0	-	185803	31861632	10
Om07	Group12	69505	sc00334	72.172	SC00334	+	108597	32156131	11
Om07	Group12	69510	sc00334	72.405	SC00334	+	124764	32172298	11
Om07	Group12	64711	sc00174	72.426	SC00174	+	471827	32686365	12
Om07	Group12	64730	sc00174	72.683	SC00174	+	550063	32764601	12
Om07	Group12	64767	sc00174	77.583	SC00174	+	726095	32940633	12
Om08	Group24	501	RACA_30	11.733	CHRR00164.0	-	2870261	8942065	0
Om08	Group24	279	RACA_30	14.112	CHRR00164.0	-	767617	11044709	0
Om08	Group24	264	RACA_30	16.42	CHRR00164.0	-	657894	11154432	0
Om08	Group24	259	RACA_30	16.464	CHRR00164.0	-	585838	11226488	0
Om08	Group24	218	RACA_30	17.163	CHRR00164.0	-	129390	11682936	0
Om08	Group24	70591	sc00568	20.89	SC00568	-	16382	11819467	1
Om08	Group24	145	RACA_30	24.242	CHRR00163.0	-	10836861	12315589	2
Om08	Group24	114	RACA_30	26.482	CHRR00163.0	-	10570814	12581636	2
Om08	Group24	1613	RACA_30	27.897	CHRR00163.0	-	3641926	19510524	2
Om08	Group24	30600	RACA_1	29.235	CHRR00002.0	+	4070	23156619	3
Om08	Group24	69482	sc00332	30.65	SC00332	-	151229	23733742	4
Om08	Group24	1625	RACA_30	30.966	CHRR00162.0	-	438319	24053211	5
Om08	Group24	1761	RACA_30	30.981	CHRR00162.0	-	56523	24435007	5
Om08	Group24	51482	RACA_2	31.1	CHRR00029.0	-	146940	24495002	6
Om08	Group24	67742	sc00266	38.493	SC00266	+	12891	24654932	7
Om08	Group24	70333	sc00440	39.834	SC00440	-	53066	25022579	8
Om09	Group17	64104	sc00158	3.999	CHRR00096.0	+	33498	33498	0
Om09	Group17	64079	sc00158	7.202	CHRR00096.0	+	162183	162183	0
Om09	Group17	46641	RACA_19	7.721	CHRR00026.0	-	555078	765997	1
Om09	Group17	46561	RACA_19	8.413	CHRR00026.0	-	109767	1211308	1
Om09	Group17	5790	RACA_29	13.78	CHRR00139.0	-	3127416	1410939	2
Om09	Group17	5741	RACA_29	13.78	CHRR00139.0	-	2714414	1823941	2
Om09	Group17	5677	RACA_29	13.78	CHRR00139.0	-	2267765	2270590	2
Om09	Group17	71280	sc01671	15.261	SC01671	-	6448	4539762	3
Om09	Group17	5425	RACA_29	15.33	CHRR00138.0	-	6065525	4845913	4
Om09	Group17	5369	RACA_29	16.651	CHRR00138.0	-	5523562	5387876	4
Om09	Group17	5366	RACA_29	17.078	CHRR00138.0	-	5430983	5480455	4
Om09	Group17	5282	RACA_29	20.436	CHRR00138.0	-	4762931	6148507	4
Om09	Group17	5220	RACA_29	21.753	CHRR00138.0	-	4301830	6609608	4
Om09	Group17	5145	RACA_29	27.981	CHRR00138.0	-	3563401	7348037	4
Om09	Group17	5143	RACA_29	27.981	CHRR00138.0	-	3551852	7359586	4
Om09	Group17	5042	RACA_29	28.857	CHRR00138.0	-	2560377	8351061	4
Om09	Group17	5005	RACA_29	28.857	CHRR00138.0	-	2297475	8613963	4
Om09	Group17	49950	RACA_28	31.024	CHRR00040.0	-	1394573	12606513	5
Om09	Group17	4764	RACA_29	33.63	CHRR00137.0	-	1228958	14237649	6
Om09	Group17	4724	RACA_29	35.589	CHRR00137.0	-	602486	14864121	6
Om09	Group17	10248	RACA_34	42.482	CHRR00064.0	-	1357	16239116	7
Om09	Group17	35585	RACA_37	42.605	CHRR00079.0	-	97576	16949523	8
Om09	Group17	69165	sc00315	43.766	SC00315	-	69720	17186188	9
Om09	Group17	4406	RACA_29	45.322	CHRR00136.0	-	339813	19856513	10
Om09	Group17	4368	RACA_29	46.782	CHRR00136.0	-	16686	20179640	10
Om09	Group17	68384	sc00284	46.798	SC00284	-	86096	20426667	11
Om09	Group17	4362	RACA_29	46.837	CHRR00135.0	-	11492752	20537841	12
Om09	Group17	6488	RACA_29	49.191	CHRR00135.0	-	7774031	24256562	12
Om09	Group17	6411	RACA_29	56.289	CHRR00135.0	-	7039330	24991263	12
Om09	Group17	6393	RACA_29	56.405	CHRR00135.0	-	6868718	25161875	12
Om09	Group17	4867	RACA_29	57.115	CHRR00135.0	-	268308	31762285	12
Om09	Group17	50173	RACA_28	59.912	CHRR00042.0	-	8489	32291728	13
Om09	Group17	6271	RACA_29	59.988	CHRR00134.0	-	737641	33128266	14
Om09	Group17	6030	RACA_29	79.023	CHRR00134.0	-	485368	33380539	14
Om10	Group16	17796	RACA_27	6.973	CHRR00133.0	-	2424564	64277	0
Om10	Group16	17664	RACA_27	7.119	CHRR00133.0	-	1239571	1249270	0
Om10	Group16	17624	RACA_27	9.038	CHRR00133.0	-	836672	1652169	0
Om10	Group16	63956	sc00152	9.876	SC00152	-	1009451	2647835	1
Om10	Group16	65834	sc00206	10.151	SC00206	-	994942	3828088	2
Om10	Group16	17198	RACA_27	10.923	CHRR00132.0	-	772858	8191630	3
Om10	Group16	17164	RACA_27	10.923	CHRR00132.0	-	543334	8421154	3
Om10	Group16	66750	sc00239	13.642	SC00239	-	504773	8990463	4
Om10	Group16	63076	RACA_33	17.097	CHRR00057.0	-	49009	9557682	5
Om10	Group16	17040	RACA_27	24.295	CHRR00131.0	-	188411	10353307	6
Om10	Group16	17018	RACA_27	24.35	CHRR00131.0	-	2838	10538880	6
Om10	Group16	54652	RACA_17	24.598	CHRR00021.0	-	108017	10624780	7
Om10	Group16	16993	RACA_27	25.566	CHRR00130.0	-	14769485	10908318	8
Om10	Group16	16866	RACA_27	26.312	CHRR00130.0	-	13791083	11886720	8
Om10	Group16	16858	RACA_27	28.853	CHRR00130.0	-	13721388	11956415	8
Om10	Group16	16660	RACA_27	29.537	CHRR00130.0	-	11788440	13889363	8
Om10	Group16	18471	RACA_27	34.479	CHRR00130.0	-	8714615	16963188	8
Om10	Group16	18313	RACA_27	35.436	CHRR00130.0	-	7278458	18399345	8
Om10	Group16	18285	RACA_27	36.076	CHRR00130.0	-	7065497	18612306	8
Om10	Group16	18271	RACA_27	41.246	CHRR00130.0	-	6901389	18776414	8
Om10	Group16	18106	RACA_27	44.315	CHRR00130.0	-	4999388	20678415	8
Om10	Group16	18101	RACA_27	45.475	CHRR00130.0	-	4990603	20687200	8
Om10	Group16	18061	RACA_27	46.309	CHRR00130.0	-	4666526	21011277	8
Om10	Group16	17975	RACA_27	47.592	CHRR00130.0	-	3722383	21955420	8
Om10	Group16	17909	RACA_27	49.806	CHRR00130.0	-	3121322	22556481	8
Om10	Group16	17904	RACA_27	51.597	CHRR00130.0	-	3067743	22610060	8
Om10	Group16	17850	RACA_27	53.782	CHRR00130.0	-	2449716	23228087	8
Om10	Group16	17566	RACA_27	55.585	CHRR00130.0	-	1868520	23809283	8
Om10	Group16	16960	RACA_27	55.61	CHRR00130.0	-	1286700	24391103	8
Om10	Group16	18051	RACA_27	55.757	CHRR00130.0	-	294261	25383542	8
Om10	Group16	50656	RACA_26	57.269	CHRR00128.0	-	361181	25779706	9
Om10	Group16	50622	RACA_26	57.822	CHRR00128.0	-	154175	25986712	9
Om10	Group16	71052	sc01100	58.25	SC01100	-	154	26152953	10
Om10	Group16	18141	RACA_27	59.125	CHRR00129.0	-	54721	26276848	11
Om10	Group16	18540	RACA_27	59.125	CHRR00129.0	-	8388	26323181	11
Om10	Group16	50582	RACA_26	60.983	CHRR00127.0	-	2845353	26550446	12
Om10	Group16	50559	RACA_26	60.983	CHRR00127.0	-	2677586	26718213	12
Om10	Group16	50444	RACA_26	61.443	CHRR00127.0	-	2209640	27186159	12
Om10	Group16	50435	RACA_26	61.46	CHRR00127.0	-	2164397	27231402	12
Om10	Group16	50372	RACA_26	61.46	CHRR00127.0	-	1708539	27687260	12
Om10	Group16	50362	RACA_26	61.837	CHRR00127.0	-	1662804	27732995	12
Om10	Group16	50788	RACA_26	62.745	CHRR00127.0	-	935469	28460330	12
Om10	Group16	50699	RACA_26	62.745	CHRR00127.0	-	482790	28913009	12
Om10	Group16	50516	RACA_26	62.745	CHRR00127.0	-	253519	29142280	12
Om11	Group1	66471	sc00230	9.078	SC00230	+	6764	6764	0
Om11	Group1	46098	RACA_23	9.538	RACA_23	+	28318	632314	1
Om11	Group1	46131	RACA_23	10.321	RACA_23	+	55405	659401	1
Om11	Group1	46133	RACA_23	10.389	RACA_23	+	569437	1173433	1
Om11	Group1	46157	RACA_23	10.814	RACA_23	+	839984	1443980	1
Om11	Group1	45961	RACA_23	11.116	RACA_23	+	1772926	2376922	1
Om11	Group1	65501	sc00203	11.432	CHRR00103.0	+	4081	3456022	2
Om11	Group1	65527	sc00203	11.443	CHRR00103.0	+	170918	3622859	2
Om11	Group1	68772	sc00298	11.443	SC00298	-	169401	3810483	3
Om11	Group1	38456	RACA_36	12.225	CHRR00075.0	+	92093	4072076	4
Om11	Group1	38457	RACA_36	12.233	CHRR00075.0	+	92237	4072220	4
Om11	Group1	49627	RACA_39	12.51	CHRR00087.0	-	533113	4359194	5
Om11	Group1	53626	RACA_24	17.826	CHRR00110.0	+	2036406	6928812	6
Om11	Group1	53749	RACA_24	21.943	CHRR00110.0	+	3184503	8076909	6
Om11	Group1	53995	RACA_24	22.022	CHRR00110.0	+	6055661	10948067	6
Om11	Group1	54016	RACA_24	22.024	CHRR00110.0	+	6269809	11162215	6
Om11	Group1	53439	RACA_24	32.255	CHRR00113.0	-	1377450	13033106	7
Om11	Group1	53397	RACA_24	33.077	CHRR00113.0	-	878210	13532346	7
Om11	Group1	54168	RACA_24	39.087	CHRR00111.0	+	1646569	16057224	8
Om11	Group1	54181	RACA_24	40.937	CHRR00111.0	+	1731421	16142076	8
Om11	Group1	54219	RACA_24	42.308	CHRR00111.0	+	2136574	16547229	8
Om11	Group1	54282	RACA_24	42.332	CHRR00111.0	+	2743644	17154299	8
Om11	Group1	53199	RACA_24	49.669	CHRR00112.0	-	2111278	18783758	9
Om11	Group1	53139	RACA_24	49.917	CHRR00112.0	-	1603374	19291662	9
Om11	Group1	43241	RACA_25	52.684	RACA_25	+	227606	21122741	10
Om11	Group1	43269	RACA_25	52.746	RACA_25	+	253626	21148761	10
Om11	Group1	43688	RACA_25	54.917	RACA_25	+	903109	21798244	10
Om11	Group1	43473	RACA_25	63.611	RACA_25	+	4822849	25717984	10
Om11	Group1	43498	RACA_25	65.1	RACA_25	+	5081227	25976362	10
Om11	Group1	43523	RACA_25	66.086	RACA_25	+	5363178	26258313	10
Om11	Group1	43612	RACA_25	69.799	RACA_25	+	5902216	26797351	10
Om11	Group1	68411	sc00286	70.046	SC00286	-	108586	27253124	11
Om11	Group1	71493	sc02222	70.046	SC02222	-	2669	27363473	11
Om12	Group8	45073	RACA_22	0	CHRR00185.0	+	242997	242997	0
Om12	Group8	43861	RACA_22	1.174	CHRR00185.0	+	1172700	1172700	0
Om12	Group8	44063	RACA_22	2.158	CHRR00185.0	+	1406345	1406345	0
Om12	Group8	44239	RACA_22	3.624	CHRR00185.0	+	1586558	1586558	0
Om12	Group8	44243	RACA_22	4.284	CHRR00185.0	+	1587672	1587672	0
Om12	Group8	44340	RACA_22	5.477	CHRR00185.0	+	1697249	1697249	0
Om12	Group8	45465	RACA_22	9.797	CHRR00185.0	+	5792276	5792276	0
Om12	Group8	45466	RACA_22	11.175	CHRR00185.0	+	5792436	5792436	0
Om12	Group8	45613	RACA_22	22.549	CHRR00185.0	+	7176678	7176678	0
Om12	Group8	45664	RACA_22	22.567	CHRR00185.0	+	7647987	7647987	0
Om12	Group8	45679	RACA_22	22.827	CHRR00185.0	+	7765895	7765895	0
Om12	Group8	45680	RACA_22	24.115	CHRR00185.0	+	7774121	7774121	0
Om12	Group8	45711	RACA_22	25.891	CHRR00185.0	+	8079264	8079264	0
Om12	Group8	45789	RACA_22	27.706	CHRR00185.0	+	8806867	8806867	0
Om12	Group8	45798	RACA_22	29.955	CHRR00185.0	+	8836363	8836363	0
Om12	Group8	45823	RACA_22	30.505	CHRR00185.0	+	9029738	9029738	0
Om12	Group8	43722	RACA_22	32.485	CHRR00185.0	+	10231064	10231064	0
Om12	Group8	43805	RACA_22	34.322	CHRR00185.0	+	11001852	11001852	0
Om12	Group8	43836	RACA_22	36.24	CHRR00185.0	+	11403416	11403416	0
Om12	Group8	43881	RACA_22	36.992	CHRR00185.0	+	12047803	12047803	0
Om12	Group8	43882	RACA_22	36.992	CHRR00185.0	+	12047971	12047971	0
Om12	Group8	43950	RACA_22	38.755	CHRR00185.0	+	12819975	12819975	0
Om12	Group8	43961	RACA_22	39.849	CHRR00185.0	+	12974040	12974040	0
Om12	Group8	43978	RACA_22	41.082	CHRR00185.0	+	13198021	13198021	0
Om12	Group8	44107	RACA_22	43.153	CHRR00185.0	+	14492253	14492253	0
Om12	Group8	44124	RACA_22	45.039	CHRR00185.0	+	14604395	14604395	0
Om12	Group8	44317	RACA_22	45.518	CHRR00185.0	+	16708263	16708263	0
Om12	Group8	44396	RACA_22	45.842	CHRR00185.0	+	17410805	17410805	0
Om12	Group8	44546	RACA_22	47.511	CHRR00185.0	+	18643839	18643839	0
Om12	Group8	44553	RACA_22	48.364	CHRR00185.0	+	18778871	18778871	0
Om12	Group8	44590	RACA_22	51.195	CHRR00185.0	+	19118033	19118033	0
Om12	Group8	44627	RACA_22	52.501	CHRR00185.0	+	19642033	19642033	0
Om12	Group8	44676	RACA_22	53.363	CHRR00185.0	+	20340161	20340161	0
Om12	Group8	44745	RACA_22	55.045	CHRR00185.0	+	20790320	20790320	0
Om12	Group8	69414	sc00327	55.283	SC00327	-	160007	21279066	1
Om12	Group8	44855	RACA_22	60.425	CHRR00186.0	+	662156	22101328	2
Om12	Group8	44858	RACA_22	60.951	CHRR00186.0	+	680822	22119994	2
Om12	Group8	44865	RACA_22	62.628	CHRR00186.0	+	721464	22160636	2
Om12	Group8	44903	RACA_22	63.151	CHRR00186.0	+	1083336	22522508	2
Om12	Group8	45025	RACA_22	68.657	CHRR00186.0	+	2145827	23584999	2
Om12	Group8	68130	sc00278	69.865	SC00278	-	171041	24050741	3
Om12	Group8	58955	RACA_21	69.881	CHRR00036.0	+	107055	24328936	4
Om12	Group8	59038	RACA_21	69.881	CHRR00036.0	+	705382	24927263	4
Om12	Group8	69252	sc00319	69.97	SC00319	-	43563	25568908	5
Om12	Group8	69248	sc00319	70.034	SC00319	-	26530	25585941	5
Om12	Group8	59151	RACA_21	70.15	CHRR00034.0	-	643265	25913732	6
Om12	Group8	65113	sc00191	70.884	CHRR00100.0	-	274508	26576806	7
Om12	Group8	68016	sc00276	72.394	SC00276	-	104769	27189539	8
Om13	Group15	7903	RACA_20	11.448	CHRR00126.0	-	19322792	4141948	0
Om13	Group15	7563	RACA_20	11.742	CHRR00126.0	-	15727448	7737292	0
Om13	Group15	7496	RACA_20	14.444	CHRR00126.0	-	15042643	8422097	0
Om13	Group15	7491	RACA_20	14.561	CHRR00126.0	-	14996688	8468052	0
Om13	Group15	7469	RACA_20	14.622	CHRR00126.0	-	14764412	8700328	0
Om13	Group15	7442	RACA_20	16.732	CHRR00126.0	-	14464938	8999802	0
Om13	Group15	7213	RACA_20	26.191	CHRR00126.0	-	11736282	11728458	0
Om13	Group15	7209	RACA_20	26.456	CHRR00126.0	-	11721284	11743456	0
Om13	Group15	8956	RACA_20	29.345	CHRR00126.0	-	2997103	20467637	0
Om13	Group15	8814	RACA_20	35.275	CHRR00126.0	-	1334928	22129812	0
Om13	Group15	46490	RACA_19	42.098	CHRR00027.0	-	2485288	23965743	1
Om13	Group15	8620	RACA_20	42.925	CHRR00125.0	-	1273724	27066739	2
Om13	Group15	8549	RACA_20	44.742	CHRR00125.0	-	335637	28004826	2
Om13	Group15	14160	RACA_32	50.409	CHRR00052.0	-	32704	28502072	3
Om13	Group15	68862	sc00302	50.543	SC00302	-	70653	28715611	4
Om13	Group15	52959	RACA_24	54.081	CHRR00038.0	-	675617	28805571	5
Om13	Group15	8715	RACA_20	54.394	CHRR00031.0	+	562239	30043526	6
Om13	Group15	7238	RACA_20	55.688	CHRR00031.0	+	1723791	31205078	6
Om13	Group15	7586	RACA_20	56.71	CHRR00031.0	+	2126207	31607494	6
Om13	Group15	64158	sc00158	61.405	CHRR00097.0	-	373571	32934221	7
Om13	Group15	46350	RACA_19	63.619	CHRR00025.0	-	250368	33453348	8
Om13	Group15	27357	RACA_10	69.002	CHRR00007.0	-	117416	33728216	9
Om13	Group15	27356	RACA_10	69.176	CHRR00007.0	-	117231	33728401	9
Om14	Group14	56320	RACA_17	4.085	CHRR00122.0	+	3434491	3434491	0
Om14	Group14	56327	RACA_17	4.682	CHRR00122.0	+	3478859	3478859	0
Om14	Group14	56415	RACA_17	6.609	CHRR00122.0	+	4377688	4377688	0
Om14	Group14	56425	RACA_17	6.65	CHRR00122.0	+	4531250	4531250	0
Om14	Group14	52840	RACA_18	8.725	RACA_18	-	364751	5653757	1
Om14	Group14	65341	sc00197	9.185	SC00197	+	67939	6086546	2
Om14	Group14	65352	sc00197	10.353	SC00197	+	791328	6809935	2
Om14	Group14	63908	sc00129	11.722	SC00129	-	737408	7501467	3
Om14	Group14	56470	RACA_17	14.694	CHRR00123.0	+	95378	8334352	4
Om14	Group14	56566	RACA_17	14.8	CHRR00123.0	+	878874	9117848	4
Om14	Group14	56615	RACA_17	15.69	CHRR00123.0	+	1440776	9679750	4
Om14	Group14	56616	RACA_17	18.591	CHRR00123.0	+	1440833	9679807	4
Om14	Group14	56623	RACA_17	19.298	CHRR00123.0	+	1540707	9779681	4
Om14	Group14	56649	RACA_17	21.975	CHRR00123.0	+	1741989	9980963	4
Om14	Group14	56682	RACA_17	22.514	CHRR00123.0	+	2083469	10322443	4
Om14	Group14	56803	RACA_17	25.378	CHRR00123.0	+	3528290	11767264	4
Om14	Group14	56840	RACA_17	27.872	CHRR00123.0	+	3879196	12118170	4
Om14	Group14	56874	RACA_17	27.872	CHRR00123.0	+	4019546	12258520	4
Om14	Group14	56904	RACA_17	30.777	CHRR00123.0	+	4336645	12575619	4
Om14	Group14	56910	RACA_17	31.329	CHRR00123.0	+	4355856	12594830	4
Om14	Group14	56968	RACA_17	31.909	CHRR00123.0	+	4836630	13075604	4
Om14	Group14	54393	RACA_17	33.823	CHRR00123.0	+	5315172	13554146	4
Om14	Group14	54423	RACA_17	37.182	CHRR00123.0	+	5593320	13832294	4
Om14	Group14	54432	RACA_17	37.397	CHRR00123.0	+	5662738	13901712	4
Om14	Group14	54506	RACA_17	40.508	CHRR00123.0	+	6284317	14523291	4
Om14	Group14	54872	RACA_17	40.908	CHRR00022.0	+	2272244	16888518	5
Om14	Group14	54879	RACA_17	40.971	CHRR00022.0	+	2460002	17076276	5
Om14	Group14	54608	RACA_17	41.494	CHRR00124.0	+	645961	18670507	6
Om14	Group14	54627	RACA_17	44.172	CHRR00124.0	+	779553	18804099	6
Om14	Group14	55032	RACA_17	47.185	CHRR00024.0	+	203677	19219082	7
Om14	Group14	55140	RACA_17	53.809	CHRR00024.0	+	1259196	20274601	7
Om14	Group14	55438	RACA_17	55.537	CHRR00024.0	+	4203669	23219074	7
Om14	Group14	55545	RACA_17	62.325	CHRR00024.0	+	5292022	24307427	7
Om14	Group14	55562	RACA_17	65.69	CHRR00024.0	+	5376990	24392395	7
Om14	Group14	55635	RACA_17	66.578	CHRR00024.0	+	6255186	25270591	7
Om14	Group14	55868	RACA_17	67.948	CHRR00024.0	+	8253687	27269092	7
Om14	Group14	56010	RACA_17	68.433	CHRR00024.0	+	9591732	28607137	7
Om14	Group14	56169	RACA_17	68.469	CHRR00024.0	+	10660903	29676308	7
Om14	Group14	56206	RACA_17	68.511	CHRR00024.0	+	10860333	29875738	7
Om14	Group14	56214	RACA_17	68.65	CHRR00024.0	+	10880646	29896051	7
Om14	Group14	72027	sc08363	75.43	SC08363	-	131	29987590	8
Om15	Group18	39841	RACA_16	7.715	CHRR00142.0	+	3475	3475	0
Om15	Group18	39852	RACA_16	7.728	CHRR00142.0	+	92384	92384	0
Om15	Group18	65199	sc00195	9.72	SC00195	+	212742	1483399	1
Om15	Group18	39996	RACA_16	12.82	CHRR00143.0	+	16304	2102535	2
Om15	Group18	40009	RACA_16	13.386	CHRR00143.0	+	156084	2242315	2
Om15	Group18	40010	RACA_16	15.603	CHRR00143.0	+	229528	2315759	2
Om15	Group18	40179	RACA_16	17.579	CHRR00143.0	+	2113095	4199326	2
Om15	Group18	40182	RACA_16	18.308	CHRR00143.0	+	2120240	4206471	2
Om15	Group18	42020	RACA_16	20.731	CHRR00140.0	+	744269	7846726	3
Om15	Group18	41541	RACA_16	21.669	CHRR00140.0	+	3101726	10204183	3
Om15	Group18	41544	RACA_16	21.813	CHRR00140.0	+	3153349	10255806	3
Om15	Group18	69557	sc00337	22.12	SC00337	-	2650	10426666	4
Om15	Group18	41551	RACA_16	22.162	CHRR00141.0	+	52560	10481975	5
Om15	Group18	41678	RACA_16	23.025	CHRR00141.0	+	1286865	11716280	5
Om15	Group18	41792	RACA_16	23.263	CHRR00141.0	+	2264446	12693861	5
Om15	Group18	41828	RACA_16	23.318	CHRR00141.0	+	2656201	13085616	5
Om15	Group18	42063	RACA_16	23.813	CHRR00141.0	+	4552727	14982142	5
Om15	Group18	39659	RACA_16	24.202	CHRR00141.0	+	6896961	17326376	5
Om15	Group18	41390	RACA_16	25.221	CHRR00144.0	+	9943333	28859210	6
Om15	Group18	41391	RACA_16	25.221	CHRR00144.0	+	9943473	28859350	6
Om15	Group18	41474	RACA_16	27.503	CHRR00144.0	+	10366648	29282525	6
Om15	Group18	65937	sc00214	29.214	SC00214	-	310190	29948838	7
Om15	Group18	64513	sc00165	29.93	SC00165	-	582836	30685124	8
Om16	Group19	58075	RACA_15	0	CHRR00145.0	+	2052767	2052767	0
Om16	Group19	58130	RACA_15	0.893	CHRR00145.0	+	2108288	2108288	0
Om16	Group19	58286	RACA_15	2.196	CHRR00145.0	+	2905398	2905398	0
Om16	Group19	58317	RACA_15	4.99	CHRR00145.0	+	3259756	3259756	0
Om16	Group19	58575	RACA_15	5.528	CHRR00145.0	+	6621018	6621018	0
Om16	Group19	58644	RACA_15	11.817	CHRR00145.0	+	7423094	7423094	0
Om16	Group19	71495	sc02229	15.246	SC02229	+	201	7690649	1
Om16	Group19	71496	sc02229	17.088	SC02229	+	398	7690846	1
Om16	Group19	58717	RACA_15	17.68	CHRR00146.0	+	339482	8034307	2
Om16	Group19	58777	RACA_15	17.826	CHRR00146.0	+	1110074	8804899	2
Om16	Group19	58806	RACA_15	18.001	CHRR00146.0	+	1292805	8987630	2
Om16	Group19	58892	RACA_15	20.013	CHRR00146.0	+	2052306	9747131	2
Om16	Group19	57097	RACA_15	20.326	CHRR00146.0	+	3365457	11060282	2
Om16	Group19	57109	RACA_15	20.344	CHRR00146.0	+	3465896	11160721	2
Om16	Group19	57136	RACA_15	22.43	CHRR00146.0	+	3718937	11413762	2
Om16	Group19	50167	RACA_28	26.419	CHRR00041.0	-	426735	18350930	3
Om16	Group19	14177	RACA_32	26.419	CHRR00053.0	-	127935	19175701	3
Om16	Group19	57974	RACA_15	27.855	CHRR00016.0	-	164290	22225849	4
Om16	Group19	28291	RACA_38	28.026	CHRR00082.0	+	111714	22501952	5
Om16	Group19	28292	RACA_38	28.026	CHRR00082.0	+	111771	22502009	5
Om16	Group19	46778	RACA_14	30.453	RACA_14	-	1720075	27464430	6
Om16	Group19	47382	RACA_14	31.038	RACA_14	-	618399	28566106	6
Om16	Group19	46943	RACA_14	31.939	RACA_14	-	284612	28899893	6
Om16	Group19	63320	sc00080	34.151	SC00080	-	1795666	29784510	7
Om16	Group19	63316	sc00080	35.001	SC00080	-	1658792	29921384	7
Om16	Group19	63424	sc00080	49.879	SC00080	-	936314	30643862	7
Om16	Group19	63398	sc00080	53.324	SC00080	-	585032	30995144	7
Om16	Group19	63396	sc00080	53.324	SC00080	-	583437	30996739	7
Om17	Group3	71895	sc06225	2.922	SC06225	-	714	645	0
Om17	Group3	2278	RACA_11	5.566	CHRR00167.0	+	112219	113677	1
Om17	Group3	3471	RACA_11	5.875	CHRR00167.0	+	424016	425474	1
Om17	Group3	3472	RACA_11	5.876	CHRR00167.0	+	424041	425499	1
Om17	Group3	2213	RACA_11	5.882	CHRR00167.0	+	1059114	1060572	1
Om17	Group3	2767	RACA_11	5.882	CHRR00167.0	+	1594452	1595910	1
Om17	Group3	68918	sc00304	7.042	SC00304	-	51994	1894490	2
Om17	Group3	64988	sc00187	7.052	SC00187	+	144306	2090889	3
Om17	Group3	3650	RACA_11	21.446	CHRR00168.0	+	4331890	7135205	4
Om17	Group3	3733	RACA_11	26.633	CHRR00168.0	+	4974369	7777684	4
Om17	Group3	3752	RACA_11	27.649	CHRR00168.0	+	5167598	7970913	4
Om17	Group3	3933	RACA_11	33.198	CHRR00168.0	+	7257366	10060681	4
Om17	Group3	3956	RACA_11	37.709	CHRR00168.0	+	7479184	10282499	4
Om17	Group3	3983	RACA_11	37.927	CHRR00168.0	+	7638939	10442254	4
Om17	Group3	59411	RACA_12	42.037	RACA_12	+	2705232	15051792	5
Om17	Group3	34998	RACA_31	43.284	CHRR00046.0	-	47499	17484574	6
Om17	Group3	69297	sc00321	46.697	SC00321	+	42392	17574564	7
Om17	Group3	70545	sc00536	46.922	SC00536	-	10600	17742125	8
Om17	Group3	68651	sc00294	47.881	SC00294	-	273022	17763914	9
Om17	Group3	68655	sc00294	48.419	SC00294	-	40653	17996283	9
Om17	Group3	2631	RACA_11	49.872	CHRR00169.0	+	2864986	20902021	10
Om17	Group3	3174	RACA_11	50.556	CHRR00169.0	+	8180473	26217508	10
Om17	Group3	3242	RACA_11	53.365	CHRR00169.0	+	8934380	26971415	10
Om17	Group3	71651	sc03130	54.427	SC03130	-	1841	27140081	11
Om17	Group3	69452	sc00330	54.731	SC00330	-	114998	27238409	12
Om17	Group3	26964	RACA_10	55.336	CHRR00009.0	-	15429	27499167	13
Om17	Group3	42933	RACA_13	56.741	CHRR00166.0	-	1175807	29045894	14
Om17	Group3	42881	RACA_13	58.596	CHRR00166.0	-	748851	29472850	14
Om17	Group3	39836	RACA_16	68.147	CHRR00018.0	-	40140	30232778	15
Om17	Group3	67922	sc00272	68.213	SC00272	-	251983	30353977	16
Om17	Group3	42730	RACA_13	68.213	CHRR00165.0	-	503298	30932236	17
Om17	Group3	42725	RACA_13	68.368	CHRR00165.0	-	455159	30980375	17
Om17	Group3	43147	RACA_13	68.453	CHRR00011.0	+	961335	32396968	18
Om17	Group3	66233	sc00219	68.478	CHRR00105.0	-	108240	33692609	19
Om17	Group3	68306	sc00282	68.591	CHRR00107.0	+	195133	33996081	20
Om17	Group3	67315	sc00252	69.397	SC00252	-	236324	34359757	21
Om18	Group2	67117	sc00248	1.203	SC00248	+	171682	171682	0
Om18	Group2	34054	RACA_31	2.095	CHRR00048.0	-	75337	519114	1
Om18	Group2	27020	RACA_10	4.497	CHRR00010.0	+	420315	1014865	2
Om18	Group2	27030	RACA_10	5.059	CHRR00010.0	+	479850	1074400	2
Om18	Group2	27033	RACA_10	5.126	CHRR00010.0	+	544318	1138868	2
Om18	Group2	26887	RACA_10	5.663	CHRR00151.0	-	985206	1661427	3
Om18	Group2	26824	RACA_10	5.696	CHRR00151.0	-	540390	2106243	3
Om18	Group2	26818	RACA_10	5.838	CHRR00151.0	-	462659	2183974	3
Om18	Group2	26816	RACA_10	5.888	CHRR00151.0	-	449146	2197487	3
Om18	Group2	69567	sc00338	6.162	SC00338	+	104095	2750827	4
Om18	Group2	57934	RACA_15	6.734	CHRR00015.0	-	316334	3041950	5
Om18	Group2	70666	sc00634	7.242	SC00634	-	25807	3377867	6
Om18	Group2	64619	sc00169	9.27	SC00169	-	726387	3664985	7
Om18	Group2	70951	sc00897	9.602	SC00897	-	10217	4395182	8
Om18	Group2	26634	RACA_10	10.614	CHRR00150.0	-	14804784	5087003	9
Om18	Group2	26627	RACA_10	10.653	CHRR00150.0	-	14766647	5125140	9
Om18	Group2	26542	RACA_10	12.265	CHRR00150.0	-	13888847	6002940	9
Om18	Group2	26499	RACA_10	13.771	CHRR00150.0	-	13485447	6406340	9
Om18	Group2	26341	RACA_10	19.972	CHRR00150.0	-	11918643	7973144	9
Om18	Group2	26321	RACA_10	20.504	CHRR00150.0	-	11764353	8127434	9
Om18	Group2	26270	RACA_10	24.05	CHRR00150.0	-	11165494	8726293	9
Om18	Group2	26163	RACA_10	25.512	CHRR00150.0	-	9834178	10057609	9
Om18	Group2	26002	RACA_10	25.517	CHRR00150.0	-	8097952	11793835	9
Om18	Group2	25931	RACA_10	27.201	CHRR00150.0	-	7430170	12461617	9
Om18	Group2	25792	RACA_10	30.55	CHRR00150.0	-	6318874	13572913	9
Om18	Group2	25772	RACA_10	32.277	CHRR00150.0	-	6164284	13727503	9
Om18	Group2	25689	RACA_10	37.744	CHRR00150.0	-	5081747	14810040	9
Om18	Group2	25684	RACA_10	38.914	CHRR00150.0	-	5030945	14860842	9
Om18	Group2	25683	RACA_10	39.173	CHRR00150.0	-	5023162	14868625	9
Om18	Group2	25641	RACA_10	40.725	CHRR00150.0	-	4525831	15365956	9
Om18	Group2	27816	RACA_10	44.041	CHRR00150.0	-	3982924	15908863	9
Om18	Group2	27710	RACA_10	47.009	CHRR00150.0	-	2857278	17034509	9
Om18	Group2	27523	RACA_10	48.948	CHRR00150.0	-	1316264	18575523	9
Om18	Group2	27500	RACA_10	49.114	CHRR00150.0	-	1105973	18785814	9
Om18	Group2	27437	RACA_10	53.749	CHRR00150.0	-	355267	19536520	9
Om18	Group2	27401	RACA_10	54.836	CHRR00150.0	-	39466	19852321	9
Om18	Group2	70235	sc00419	58.027	SC00419	-	20764	19920499	10
Om18	Group2	27321	RACA_10	66.054	CHRR00148.0	-	1455744	20107048	11
Om18	Group2	27313	RACA_10	66.081	CHRR00148.0	-	1239584	20323208	11
Om18	Group2	27270	RACA_10	67.636	CHRR00148.0	-	938142	20624650	11
Om18	Group2	27269	RACA_10	67.64	CHRR00148.0	-	938005	20624787	11
Om18	Group2	27391	RACA_10	67.656	CHRR00149.0	-	369736	21611037	12
Om18	Group2	27366	RACA_10	67.656	CHRR00149.0	-	15891	21964882	12
Om18	Group2	67899	sc00271	67.656	SC00271	-	250497	22062758	12
Om18	Group2	70670	sc00636	67.753	SC00636	-	19534	22314255	13
Om18	Group2	27156	RACA_10	71.613	CHRR00147.0	-	3386650	22364340	14
Om18	Group2	27154	RACA_10	71.613	CHRR00147.0	-	3378336	22372654	14
Om18	Group2	27128	RACA_10	71.613	CHRR00147.0	-	3172701	22578289	14
Om18	Group2	27124	RACA_10	71.613	CHRR00147.0	-	3161753	22589237	14
Om18	Group2	27103	RACA_10	72.043	CHRR00147.0	-	3001234	22749756	14
Om19	Group22	19713	RACA_9	0	CHRR00158.0	+	2666148	2666148	0
Om19	Group22	19783	RACA_9	6.402	CHRR00158.0	+	3470494	3470494	0
Om19	Group22	19846	RACA_9	11.801	CHRR00158.0	+	3872472	3872472	0
Om19	Group22	65421	sc00200	14.83	SC00200	-	644105	4518508	1
Om19	Group22	65440	sc00200	14.83	SC00200	-	9929	5152684	1
Om19	Group22	65438	sc00200	16.37	SC00200	-	719	5161894	1
Om19	Group22	66400	sc00223	20.951	SC00223	-	543276	5237200	2
Om19	Group22	38379	RACA_36	22.318	CHRR00073.0	-	139893	5782951	3
Om19	Group22	71584	sc02725	22.943	SC02725	-	770	5925238	4
Om19	Group22	20057	RACA_9	30.739	CHRR00159.0	+	1611513	7537620	5
Om19	Group22	20129	RACA_9	32.51	CHRR00159.0	+	2285233	8211340	5
Om19	Group22	20146	RACA_9	35.736	CHRR00159.0	+	2476634	8402741	5
Om19	Group22	20150	RACA_9	40.265	CHRR00159.0	+	2542788	8468895	5
Om19	Group22	20213	RACA_9	43.768	CHRR00159.0	+	3179464	9105571	5
Om19	Group22	20233	RACA_9	44.505	CHRR00159.0	+	3403509	9329616	5
Om19	Group22	20257	RACA_9	45.204	CHRR00159.0	+	3669485	9595592	5
Om19	Group22	20263	RACA_9	45.204	CHRR00159.0	+	3737773	9663880	5
Om19	Group22	20344	RACA_9	48.369	CHRR00159.0	+	4889191	10815298	5
Om19	Group22	20353	RACA_9	48.369	CHRR00159.0	+	4964372	10890479	5
Om19	Group22	20390	RACA_9	51.323	CHRR00159.0	+	5401288	11327395	5
Om19	Group22	18645	RACA_9	52.013	CHRR00159.0	+	6208495	12134602	5
Om19	Group22	18694	RACA_9	52.426	CHRR00159.0	+	6805990	12732097	5
Om19	Group22	18718	RACA_9	53.527	CHRR00159.0	+	6975011	12901118	5
Om19	Group22	18814	RACA_9	53.542	CHRR00159.0	+	7956564	13882671	5
Om19	Group22	8516	RACA_20	54.039	CHRR00032.0	-	143530	16775664	6
Om19	Group22	65496	sc00203	61.409	CHRR00102.0	-	429207	16969130	7
Om19	Group22	65543	sc00203	61.409	CHRR00102.0	-	80820	17317517	7
Om19	Group22	19096	RACA_9	61.776	CHRR00160.0	+	347944	17746380	8
Om19	Group22	19165	RACA_9	62.037	CHRR00160.0	+	858590	18257026	8
Om19	Group22	19204	RACA_9	62.534	CHRR00160.0	+	1193079	18591515	8
Om19	Group22	19208	RACA_9	63.722	CHRR00160.0	+	1241560	18639996	8
Om19	Group22	19274	RACA_9	66.055	CHRR00160.0	+	2006284	19404720	8
Om19	Group22	42452	RACA_8	66.18	RACA_8	-	606138	21041286	9
Om19	Group22	42426	RACA_8	70.166	RACA_8	-	376491	21270933	9
Om19	Group22	42421	RACA_8	70.166	RACA_8	-	322148	21325276	9
Om19	Group22	19358	RACA_9	71.339	CHRR00161.0	+	268750	21916273	10
Om19	Group22	19397	RACA_9	71.535	CHRR00161.0	+	699772	22347295	10
Om19	Group22	19550	RACA_9	71.99	CHRR00161.0	+	1954878	23602401	10
Om19	Group22	19588	RACA_9	71.99	CHRR00161.0	+	2380257	24027780	10
Om20	Group23	12657	RACA_7	2.436	RACA_7	-	23197701	278757	0
Om20	Group23	12603	RACA_7	2.969	RACA_7	-	22865830	610628	0
Om20	Group23	12587	RACA_7	3.565	RACA_7	-	22734142	742316	0
Om20	Group23	12401	RACA_7	5.537	RACA_7	-	21428903	2047555	0
Om20	Group23	12211	RACA_7	6.183	RACA_7	-	19388721	4087737	0
Om20	Group23	12166	RACA_7	7.922	RACA_7	-	19026573	4449885	0
Om20	Group23	11981	RACA_7	18.275	RACA_7	-	16888450	6588008	0
Om20	Group23	11931	RACA_7	19.445	RACA_7	-	16376860	7099598	0
Om20	Group23	11911	RACA_7	20.347	RACA_7	-	16225650	7250808	0
Om20	Group23	11906	RACA_7	22.135	RACA_7	-	16197833	7278625	0
Om20	Group23	11898	RACA_7	22.135	RACA_7	-	16120531	7355927	0
Om20	Group23	11841	RACA_7	28.945	RACA_7	-	15192196	8284262	0
Om20	Group23	11839	RACA_7	29.941	RACA_7	-	15190819	8285639	0
Om20	Group23	11828	RACA_7	32.919	RACA_7	-	14988797	8487661	0
Om20	Group23	11827	RACA_7	33.109	RACA_7	-	14988740	8487718	0
Om20	Group23	11711	RACA_7	35.25	RACA_7	-	13817391	9659067	0
Om20	Group23	11670	RACA_7	36.229	RACA_7	-	13430716	10045742	0
Om20	Group23	11643	RACA_7	37.833	RACA_7	-	13132225	10344233	0
Om20	Group23	11620	RACA_7	40.246	RACA_7	-	12851857	10624601	0
Om20	Group23	11593	RACA_7	44.952	RACA_7	-	12569047	10907411	0
Om20	Group23	11565	RACA_7	47.748	RACA_7	-	12263020	11213438	0
Om20	Group23	11561	RACA_7	49.818	RACA_7	-	12196521	11279937	0
Om20	Group23	11425	RACA_7	52.492	RACA_7	-	10588518	12887940	0
Om20	Group23	13350	RACA_7	61.596	RACA_7	-	9253253	14223205	0
Om20	Group23	13346	RACA_7	61.985	RACA_7	-	9168700	14307758	0
Om20	Group23	12970	RACA_7	63.762	RACA_7	-	4953747	18522711	0
Om20	Group23	12958	RACA_7	63.762	RACA_7	-	4820996	18655462	0
Om20	Group23	12908	RACA_7	78.548	RACA_7	-	4402376	19074082	0
Om20	Group23	12748	RACA_7	81.829	RACA_7	-	2759905	20716553	0
Om20	Group23	12650	RACA_7	81.859	RACA_7	-	2317774	21158684	0
Om20	Group23	13044	RACA_7	83.357	RACA_7	-	572030	22904428	0
Om20	Group23	68392	sc00285	84.921	SC00285	-	186415	23585418	1
Om20	Group23	63494	sc00102	85.85	SC00102	-	1419885	24265167	2
Om20	Group23	63598	sc00102	85.85	SC00102	-	638932	25046120	2
Om20	Group23	34092	RACA_31	86.004	CHRR00049.0	+	277387	25962538	3
Om21	Group20	21657	RACA_5	5.072	CHRR00153.0	-	7705032	4710080	0
Om21	Group20	21634	RACA_5	7.16	CHRR00153.0	-	7581701	4833411	0
Om21	Group20	21626	RACA_5	8.781	CHRR00153.0	-	7530067	4885045	0
Om21	Group20	21425	RACA_5	10.21	CHRR00153.0	-	5576500	6838612	0
Om21	Group20	21422	RACA_5	10.855	CHRR00153.0	-	5548934	6866178	0
Om21	Group20	21333	RACA_5	11.751	CHRR00153.0	-	4668231	7746881	0
Om21	Group20	21310	RACA_5	11.835	CHRR00153.0	-	4501402	7913710	0
Om21	Group20	21309	RACA_5	12.435	CHRR00153.0	-	4501223	7913889	0
Om21	Group20	21256	RACA_5	13.74	CHRR00153.0	-	4072631	8342481	0
Om21	Group20	21189	RACA_5	17.249	CHRR00153.0	-	3229543	9185569	0
Om21	Group20	21176	RACA_5	17.249	CHRR00153.0	-	3103529	9311583	0
Om21	Group20	21150	RACA_5	18.395	CHRR00153.0	-	2862509	9552603	0
Om21	Group20	21004	RACA_5	21.364	CHRR00153.0	-	1496548	10918564	0
Om21	Group20	20876	RACA_5	22.841	CHRR00153.0	-	298931	12116181	0
Om21	Group20	50880	RACA_6	23.849	RACA_6	-	2088198	13199223	1
Om21	Group20	20568	RACA_5	24.653	CHRR00152.0	-	11489598	17428912	2
Om21	Group20	20416	RACA_5	30.374	CHRR00152.0	-	10060103	18858407	2
Om21	Group20	22983	RACA_5	34.25	CHRR00152.0	-	9455303	19463207	2
Om21	Group20	22900	RACA_5	35.375	CHRR00152.0	-	8820205	20098305	2
Om21	Group20	22890	RACA_5	38.435	CHRR00152.0	-	8722177	20196333	2
Om21	Group20	22637	RACA_5	47.048	CHRR00152.0	-	6173545	22744965	2
Om21	Group20	22606	RACA_5	48.399	CHRR00152.0	-	5944041	22974469	2
Om21	Group20	22604	RACA_5	48.931	CHRR00152.0	-	5930437	22988073	2
Om21	Group20	22510	RACA_5	51.39	CHRR00152.0	-	5139165	23779345	2
Om21	Group20	22251	RACA_5	55.731	CHRR00152.0	-	3241980	25676530	2
Om21	Group20	22182	RACA_5	57.427	CHRR00152.0	-	2687379	26231131	2
Om21	Group20	21017	RACA_5	59.864	CHRR00152.0	-	1522092	27396418	2
Om21	Group20	20832	RACA_5	59.918	CHRR00152.0	-	1354124	27564386	2
Om21	Group20	22748	RACA_5	65.005	CHRR00152.0	-	708447	28210063	2
Om21	Group20	22369	RACA_5	66.352	CHRR00152.0	-	398168	28520342	2
Om22	Group9	24945	RACA_4	0	CHRR00090.0	+	312107	312107	0
Om22	Group9	25087	RACA_4	1.566	CHRR00090.0	+	457724	457724	0
Om22	Group9	23252	RACA_4	2.645	CHRR00090.0	+	1196973	1196973	0
Om22	Group9	23430	RACA_4	2.718	CHRR00090.0	+	1345495	1345495	0
Om22	Group9	24902	RACA_4	3.238	CHRR00090.0	+	2782464	2782464	0
Om22	Group9	24915	RACA_4	9.433	CHRR00090.0	+	2885546	2885546	0
Om22	Group9	24988	RACA_4	15.393	CHRR00090.0	+	3535049	3535049	0
Om22	Group9	25106	RACA_4	17.376	CHRR00090.0	+	4676891	4676891	0
Om22	Group9	25123	RACA_4	18.912	CHRR00090.0	+	4811516	4811516	0
Om22	Group9	25153	RACA_4	19.012	CHRR00090.0	+	5061318	5061318	0
Om22	Group9	25243	RACA_4	24.022	CHRR00090.0	+	5894980	5894980	0
Om22	Group9	25252	RACA_4	24.115	CHRR00090.0	+	6025077	6025077	0
Om22	Group9	25361	RACA_4	25.501	CHRR00090.0	+	7153314	7153314	0
Om22	Group9	25369	RACA_4	27.133	CHRR00090.0	+	7245252	7245252	0
Om22	Group9	25372	RACA_4	27.287	CHRR00090.0	+	7266052	7266052	0
Om22	Group9	25414	RACA_4	27.579	CHRR00090.0	+	7673376	7673376	0
Om22	Group9	25457	RACA_4	35.407	CHRR00090.0	+	8154790	8154790	0
Om22	Group9	23356	RACA_4	38.283	CHRR00090.0	+	12767659	12767659	0
Om22	Group9	23410	RACA_4	39.956	CHRR00090.0	+	13304755	13304755	0
Om22	Group9	23453	RACA_4	41.202	CHRR00090.0	+	13646461	13646461	0
Om22	Group9	24183	RACA_4	62.029	CHRR00090.0	+	21523921	21523921	0
Om22	Group9	24253	RACA_4	64.074	CHRR00090.0	+	22131948	22131948	0
Om22	Group9	24254	RACA_4	64.082	CHRR00090.0	+	22132109	22132109	0
Om22	Group9	24274	RACA_4	64.111	CHRR00090.0	+	22260187	22260187	0
Om22	Group9	24338	RACA_4	64.114	CHRR00090.0	+	22811168	22811168	0
Om22	Group9	24468	RACA_4	64.117	CHRR00090.0	+	23933796	23933796	0
Om22	Group9	24695	RACA_4	70.601	CHRR00092.0	+	1491161	25582377	1
Om22	Group9	68600	sc00292	70.631	SC00292	-	82509	27371256	2
Om23	Group11	36399	RACA_3	0.454	RACA_3	-	2050081	292857	0
Om23	Group11	36518	RACA_3	2.129	RACA_3	-	986886	1356052	0
Om23	Group11	68564	sc00291	2.193	SC00291	-	231076	2390454	1
Om23	Group11	52256	RACA_2	3.659	CHRR00028.0	+	342124	2963753	2
Om23	Group11	68471	sc00287	8.377	SC00287	-	179534	4113729	3
Om23	Group11	66918	sc00243	9.447	SC00243	+	89712	4383074	4
Om23	Group11	66885	sc00243	10.157	SC00243	+	172690	4466052	4
Om23	Group11	52211	RACA_2	12.312	CHRR00116.0	+	1397336	6221637	5
Om23	Group11	52313	RACA_2	15.114	CHRR00116.0	+	2538916	7363217	5
Om23	Group11	52359	RACA_2	20.918	CHRR00116.0	+	3118145	7942446	5
Om23	Group11	52371	RACA_2	21.146	CHRR00116.0	+	3313090	8137391	5
Om23	Group11	52581	RACA_2	21.964	CHRR00116.0	+	5756691	10580992	5
Om23	Group11	52601	RACA_2	28.031	CHRR00116.0	+	6200428	11024729	5
Om23	Group11	71844	sc05596	29.651	SC05596	-	731	11035842	6
Om23	Group11	52614	RACA_2	30.622	CHRR00117.0	+	130824	11167496	7
Om23	Group11	52657	RACA_2	30.891	CHRR00117.0	+	676404	11713076	7
Om23	Group11	52658	RACA_2	33.057	CHRR00117.0	+	719304	11755976	7
Om23	Group11	51023	RACA_2	33.919	CHRR00117.0	+	2332629	13369301	7
Om23	Group11	51054	RACA_2	37.862	CHRR00117.0	+	2825931	13862603	7
Om23	Group11	51077	RACA_2	40.377	CHRR00117.0	+	2931435	13968107	7
Om23	Group11	51163	RACA_2	43.096	CHRR00117.0	+	3828896	14865568	7
Om23	Group11	51236	RACA_2	44.574	CHRR00117.0	+	4501396	15538068	7
Om23	Group11	51378	RACA_2	59.058	CHRR00117.0	+	6282859	17319531	7
Om23	Group11	51664	RACA_2	67.815	CHRR00117.0	+	8957517	19994189	7
Om23	Group11	51741	RACA_2	67.818	CHRR00117.0	+	9451930	20488602	7
Om23	Group11	51793	RACA_2	67.818	CHRR00117.0	+	10130182	21166854	7
Om23	Group11	51794	RACA_2	67.818	CHRR00117.0	+	10149266	21185938	7
Om23	Group11	51806	RACA_2	68.528	CHRR00117.0	+	10213083	21249755	7
Om23	Group11	51812	RACA_2	68.726	CHRR00117.0	+	10287632	21324304	7
Om23	Group11	51895	RACA_2	69.561	CHRR00117.0	+	10839775	21876447	7
Om23	Group11	51942	RACA_2	69.565	CHRR00117.0	+	11040391	22077063	7
Om23	Group11	51960	RACA_2	69.566	CHRR00117.0	+	11178370	22215042	7
Om23	Group11	70685	sc00647	71.656	SC00647	-	25846	23185942	8
Om24	Group10	31361	RACA_1	0	CHRR00115.0	-	12478955	2621561	0
Om24	Group10	31322	RACA_1	3.395	CHRR00115.0	-	11952622	3147894	0
Om24	Group10	31271	RACA_1	4.473	CHRR00115.0	-	11499823	3600693	0
Om24	Group10	31269	RACA_1	5.325	CHRR00115.0	-	11461656	3638860	0
Om24	Group10	31093	RACA_1	6.061	CHRR00115.0	-	9728694	5371822	0
Om24	Group10	31063	RACA_1	7.839	CHRR00115.0	-	9451544	5648972	0
Om24	Group10	31039	RACA_1	8.903	CHRR00115.0	-	9172408	5928108	0
Om24	Group10	30957	RACA_1	19.848	CHRR00115.0	-	8178298	6922218	0
Om24	Group10	30914	RACA_1	27.753	CHRR00115.0	-	7684344	7416172	0
Om24	Group10	30887	RACA_1	27.828	CHRR00115.0	-	7455959	7644557	0
Om24	Group10	30767	RACA_1	30.102	CHRR00115.0	-	6201429	8899087	0
Om24	Group10	30346	RACA_1	41.286	CHRR00115.0	-	1519235	13581281	0
Om24	Group10	30244	RACA_1	48.567	CHRR00115.0	-	529068	14571448	0
Om24	Group10	31380	RACA_1	57.075	CHRR00003.0	+	267750	15368365	1
Om24	Group10	32282	RACA_1	58.282	CHRR00114.0	-	3850888	18405163	2
Om24	Group10	32236	RACA_1	59.601	CHRR00114.0	-	3386687	18869364	2
Om24	Group10	31992	RACA_1	60.927	CHRR00114.0	-	1255076	21000975	2
Om24	Group10	31878	RACA_1	62.246	CHRR00114.0	-	430658	21825393	2
Om24	Group10	70792	sc00733	62.672	SC00733	-	14748	22268884	3
Om24	Group10	68894	sc00303	65.985	CHRR00108.0	-	46679	22286398	4
Om24	Group10	48944	RACA_39	67.721	CHRR00089.0	-	440930	22876920	5
Om24	Group10	31812	RACA_1	71.369	CHRR00001.0	-	339325	24356562	6
Om24	Group10	31266	RACA_1	71.378	CHRR00001.0	-	210480	24485407	6
